# Supplementary material for: Testing Explant Sources, Culture Media, and Light Conditions for the Improvement of Organogenesis in Pinus ponderosa (P. Lawson and C. Lawson)
Source: MDPI journal article supplement (doi:10.3390/plants12040850), 2023-02-14
Supplement: s1 [file s1]

## Supplementary materials

Table S1. Statistical analysis for the survival (%) showed in explants of *Pinus ponderosa* per 6-benzyladenine (BA) (4.4, 22 and 44  $\mu$ M) and cultured media (LP or half LP macronutrients) (Quoirin and Lepoivre [24], modified by Aitken-Christie et al. [25]).

| Source               | df | Survival (%)        |                |
|----------------------|----|---------------------|----------------|
|                      |    | X <sup>2</sup> Test | p-Value        |
| BA concentration (B) | 2  | 600.83              | $\leq 0.05^*$  |
| Culture medium (C)   | 1  | 608.99.             | $> 0.05^{n.s}$ |
| B x C                | 1  | 597.87              | $> 0.05^{n.s}$ |

\*Significantly different at  $p < 0.05$ , <sup>n.s</sup> Non-significant at  $p < 0.05$ , df Degrees of freedom.

Table S2. Statistical analysis for the survival (%) showed in explants of *Pinus ponderosa* per explant type (cotyledons or whole zygotic embryos) and sterilization protocol [5% commercial bleach and 10% H<sub>2</sub>O<sub>2</sub> (v/v) ].

| Source                     | df | Survival (%)        |                |
|----------------------------|----|---------------------|----------------|
|                            |    | X <sup>2</sup> Test | p-Value        |
| Explant type (E)           | 1  | 596.21              | $\leq 0.05^*$  |
| Sterilization protocol (S) | 1  | 593.11              | $> 0.05^{n.s}$ |
| E x S                      | 1  | 592.96              | $> 0.05^{n.s}$ |

\*Significantly different at  $p < 0.05$ , <sup>n.s</sup> Non-significant at  $p < 0.05$ , df Degrees of freedom.

Table S3. Statistical analysis for the explants forming shoots (EFS) (%) showed in explants of *Pinus ponderosa* per 6-benzyladenine (BA) (4.4, 22 and 44  $\mu$ M), culture media (LP or half LP macronutrients) (Quoirin and Lepoivre [24], modified by Aitken-Christie et al. [25]), explant type (cotyledons or whole zygotic embryos) and sterilization protocol [5% commercial bleach and 10% H<sub>2</sub>O<sub>2</sub> (v/v) ].

| Source                     | df | EFS (%)             |                      |
|----------------------------|----|---------------------|----------------------|
|                            |    | X <sup>2</sup> Test | p-Value              |
| BA concentration (B)       | 2  | 496.36              | >0.05 <sup>n.s</sup> |
| Cultured media (C)         | 1  | 498.04              | ≤0.05*               |
| Explant type (E)           | 1  | 534.93              | ≤0.05*               |
| Sterilization protocol (S) | 1  | 534.93              | >0.05 <sup>n.s</sup> |
| E x S                      | 1  | 496.36              | >0.05 <sup>n.s</sup> |
| E x C                      | 1  | 454.59              | ≤0.05*               |
| C x S                      | 1  | 453.84              | >0.05 <sup>n.s</sup> |
| B x E                      | 2  | 453.54              | >0.05 <sup>n.s</sup> |
| B x S                      | 2  | 452.56              | >0.05 <sup>n.s</sup> |
| B x C                      | 2  | 452.18              | >0.05 <sup>n.s</sup> |
| E x C x S                  | 1  | 448.81              | >0.05 <sup>n.s</sup> |
| B x E x S                  | 2  | 448.19              | >0.05 <sup>n.s</sup> |
| B x C x E                  | 2  | 443.74              | >0.05 <sup>n.s</sup> |
| B x C x S                  | 2  | 441.34              | >0.05 <sup>n.s</sup> |
| B x C x E x S              | 2  | 436.19              | >0.05 <sup>n.s</sup> |

\*Significantly different at  $p < 0.05$ , <sup>n.s</sup> Non-significant at  $p < 0.05$ , df Degrees of freedom.

Table S4. Statistical analysis for the survival (%) showed in explants of *Pinus ponderosa* per cytokinin type and light treatment cultured in half LP macronutrients (Quoirin and Lepoivre [24], modified by Aitken-Christie et al. [25]).

| Source              | df | Survival (%)        |                      |
|---------------------|----|---------------------|----------------------|
|                     |    | X <sup>2</sup> Test | p-Value              |
| Cytokinin type (C)  | 1  | 29.206              | ≤0.05*               |
| Light treatment (C) | 3  | 21.311              | ≤0.05*               |
| C x L               | 3  | 21.311              | >0.05 <sup>n.s</sup> |

\*Significantly different at  $p < 0.05$ , <sup>n.s</sup> Non-significant at  $p < 0.05$ , df Degrees of freedom.

Table S5. Statistical analysis for the explants forming shoots (EFS) (%) showed in explants of *Pinus ponderosa* cultured in half LP macronutrients (Quoirin and Lepoivre [24], modified by Aitken-Christie et al. [25]) supplemented with 6-benzyladenine (BA) and *meta*-Topolin (*m*-T) according to light treatment.

| Source              | df | EFS (%)             |                      |
|---------------------|----|---------------------|----------------------|
|                     |    | X <sup>2</sup> Test | p-Value              |
| Cytokinin type (C)  | 1  | 393.51              | >0.05 <sup>n.s</sup> |
| Light treatment (C) | 3  | 392.40              | >0.05 <sup>n.s</sup> |
| C x L               | 3  | 391.23              | >0.05 <sup>n.s</sup> |

<sup>n.s</sup> Non-significant at  $p < 0.05$ , df Degrees of freedom.

Table S6. ANOVA for total number of shoots produced per initial explant (NS/E) showed in explants of *Pinus ponderosa* cultured in half LP macronutrients (Quoirin and Lepoivre [24], modified by Aitken-Christie et al. [25]) supplemented with 6-benzyladenine (BA) and *meta*-Topolin (*m*-T) (13.1  $\mu$ M) according to light treatment.

| NS/E                |    |               |                      |
|---------------------|----|---------------|----------------------|
| Source              | df | <i>F</i> Test | <i>p</i> -Value      |
| Cytokinin type (C)  | 1  | 0.31          | >0.05 <sup>n.s</sup> |
| Light treatment (C) | 3  | 1.00          | >0.05 <sup>n.s</sup> |
| C x L               | 3  | 1.07          | >0.05 <sup>n.s</sup> |

\*Significantly different at  $p<0.05$ , <sup>n.s</sup> Non-significant at  $p<0.05$ , df Degrees of freedom.

Table S7. ANOVA for percentage of shoots elongated enough to be rooted (PSR) (%) showed in explants of *Pinus ponderosa* cultured in half LP macronutrients (Quoirin and Lepoivre [24], modified by Aitken-Christie et al. [25]) supplemented with 6-benzyladenine (BA) and *meta*-Topolin (*m*-T) (13.1  $\mu$ M) according to light treatment.

| PSR (%)             |    |               |                      |
|---------------------|----|---------------|----------------------|
| Source              | df | <i>F</i> Test | <i>p</i> -Value      |
| Cytokinin type (C)  | 1  | 0.02          | >0.05 <sup>n.s</sup> |
| Light treatment (C) | 3  | 3.94          | $\leq 0.05^*$        |
| C x L               | 3  | 0.21          | >0.05 <sup>n.s</sup> |

\*Significantly different at  $p<0.05$ , <sup>n.s</sup> Non-significant at  $p<0.05$ , df Degrees of freedom.

Table S8. Statistical analysis for root induction (%), number root per explant and length of longest root showed in explants of *Pinus ponderosa* cultured in half LP macronutrients (Quoirin and Lepoivre [24], modified by Aitken-Christie et al. [25]) according to light treatment.

| Source              | df | Root induction            |                      | N° root /explant |                      | Length of longest root |                      |
|---------------------|----|---------------------------|----------------------|------------------|----------------------|------------------------|----------------------|
|                     |    | <b>X<sup>2</sup> Test</b> | <b>p-Value</b>       | <b>F Test</b>    | <b>p-Value</b>       | <b>F Test</b>          | <b>p-Value</b>       |
| Light treatment (L) | 3  | 132.79                    | >0.05 <sup>n.s</sup> | 0.66             | >0.05 <sup>n.s</sup> | 0.42                   | >0.05 <sup>n.s</sup> |

<sup>n.s</sup> Non-significant at  $p < 0.05$ , df Degrees of freedom.
